# Supplementary material for: Structure-based redesign of the bacterial prolidase active-site pocket for efficient enhancement of methyl-parathion hydrolysis
Source: Royal Society of Chemistry journal article supplement (doi:10.1039/d1cy00490e), 2021-01-01
Supplement: d1cy00490e1.pdf [file d1cy00490e1.pdf]

**Structure-based redesign of the bacterial prolidase active-site pocket for efficient enhancement of methyl-parathion hydrolysis**

**(Supplementary information)**

**Jian Yang<sup>a,b,c\*</sup>, Yunzhu Xiao<sup>a,b,d</sup>, Yu Liu<sup>a,b</sup>, Ru Li<sup>a,b</sup>, Lijuan Long<sup>a,b,c\*</sup>**

<sup>a</sup>. CAS Key Laboratory of Tropical Marine Bio-resources and Ecology, Guangdong Key Laboratory of Marine Materia Medica, South China Sea Institute of Oceanology, Chinese Academy of Sciences, Guangzhou 510301, People's Republic of China.

<sup>b</sup>. University of the Chinese Academy of Sciences, Beijing 100049, People's Republic of China.

<sup>c</sup>. Southern Marine Science and Engineering Guangdong Laboratory, Guangzhou 511458, People's Republic of China.

<sup>d</sup>. Shenzhen Key Laboratory of Microbial Genetic Engineering, College of Life Sciences and Oceanology, Shenzhen University, Shenzhen 518055, People's Republic of China.

\* Corresponding author: Jian Yang (email: yangjian@scsio.ac.cn), Lijuan Long (email: longlj@scsio.ac.cn)

**Table S1** X-ray data collection and refinement statistics

| Parameters                                                       | <i>PIOPAA</i> <sup>3R</sup> |
|------------------------------------------------------------------|-----------------------------|
| PDB ID                                                           | 7E5C                        |
| Data collection                                                  |                             |
| Beamline                                                         | SSRF-BL17U1                 |
| Space group                                                      | H32                         |
| Cell dimensions                                                  |                             |
| <i>a, b, c</i> , Å                                               | 182.9, 182.9, 372.0         |
| Wavelength, Å                                                    | 0.97918                     |
| Resolution, Å <sup>a</sup>                                       | 67.36-2.22 (2.29-2.22)      |
| Total reflections                                                | 2,239,248                   |
| Unique reflections                                               | 111,133 (3,942)             |
| Redundancy                                                       | 20.1 (18.4)                 |
| <i>R</i> <sub>sym</sub> <sup>a,b</sup>                           | 0.134 (0.079)               |
| <i>R</i> <sub>pim</sub>                                          | 0.030 (0.018)               |
| Mean ( <i>I</i> /σ)                                              | 15.9 (34.3)                 |
| CC (1/2)                                                         | 0.998 (0.998)               |
| Completeness, %                                                  | 93.9 (99.6)                 |
| Refinement                                                       |                             |
| <i>R</i> <sub>work</sub> / <i>R</i> <sub>free</sub> <sup>c</sup> | 0.217/0.240                 |
| No. of protein atoms                                             | 14,271                      |
| No. of ligand atoms                                              | 8                           |
| No. of water atoms                                               | 360                         |
| Average <i>B</i> factor, Å <sup>2</sup>                          | 36.8                        |
| RMS bond lengths, Å                                              | 0.014                       |
| RMS bond angles, °                                               | 1.49                        |
| Ramachandran distribution                                        |                             |
| Favored, %                                                       | 99.08                       |
| Allowed, %                                                       | 0.92                        |
| Outliers, %                                                      | 0                           |

<sup>a</sup> Numbers in parentheses are values for the highest-resolution shell.

<sup>b</sup>  $R_{\text{sym}} = \frac{\sum_{hkl} \sum_i |I_i - \langle I \rangle|}{\sum_{hkl} \sum_i \langle I \rangle}$ , where  $I_i$  is the intensity for the  $i$ th measurement of an equivalent reflection

with indices  $h$ ,  $k$ , and  $l$ .

<sup>c</sup>  $R_{\text{free}}$  was calculated with 5% of the reflections set aside randomly throughout the refinement.

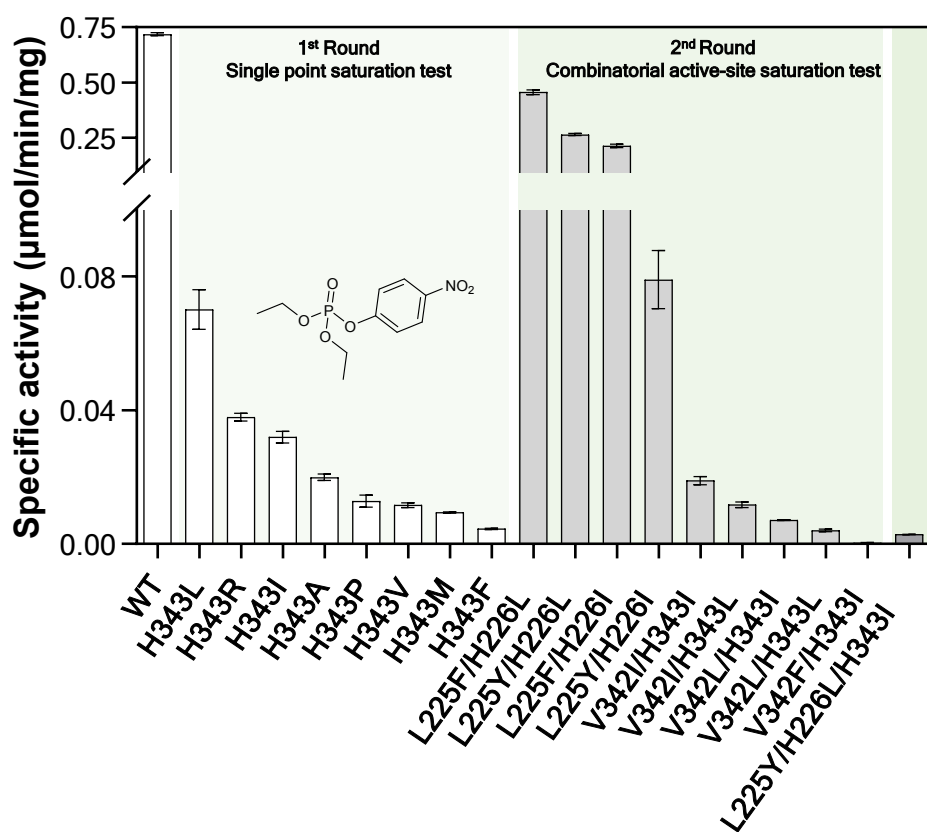

Figure S1 Catalytic activities of the wild-type enzyme and its variants on paraoxon.

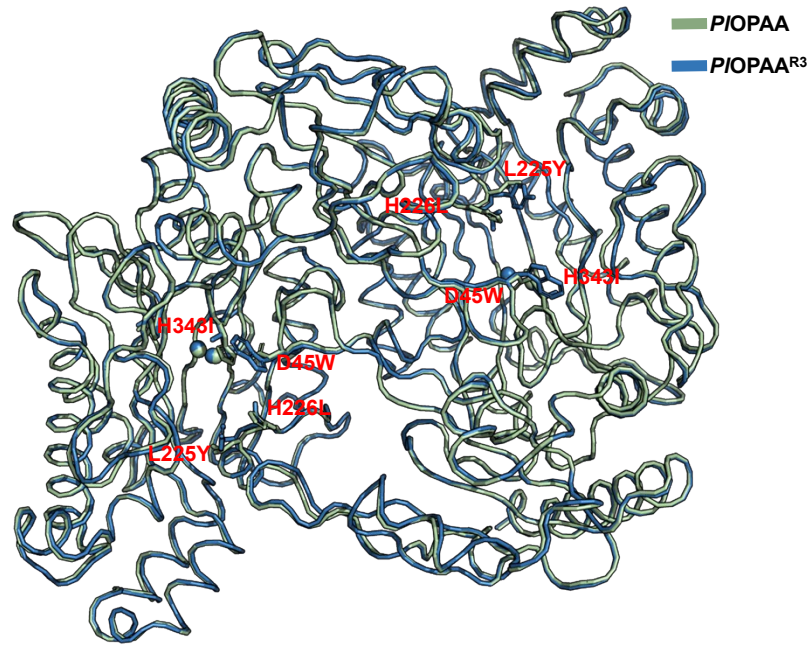

**Figure S2** Structural superposition of *PIOPAA* (PDB entry 6AH8) and *PIOPAA*<sup>3R</sup> (PDB entry 7E5C). *Ca* atoms of *PIOPAA*<sup>3R</sup> and wild-type superpose with an rmsd of 0.22 Å. The four mutations are indicated (green sticks, wild-type *PIOPAA* residues; blue sticks, *PIOPAA*<sup>3R</sup> residues).
